# Supplementary material for: Light-emitting charge transfer species promoted by metal ion coordinationElectronic Supplementary Information (ESI) available: synthesis of ligands I and II; experimental details for spectrophotometric, spectrofluorimetric and NMR determinations; additional figures (Fig. S1 and Fig. S2). See http://www.rsc.org/suppdata/cc/b3/b309148a/
Source: Royal Society of Chemistry journal article supplement (doi:10.1039/b309148a), 2003-01-01
Supplement: b309148a.doc [file b309148a.doc]

**ELECTRONIC SUPPLEMENTARY INFORMATION (ESI)**

**Synthesis of ligand I**

A solution of 2,6-pyridinedicarboxaldehyde (0.194 g, 1.43 mmol) in 30 ml of methanol was added dropwise to a stirred solution of 1-naphthalenemethylamine (0.43 ml, 3.0 mmol) in 30 ml of methanol over a period of 1 hour. The solution was stirred overnight and the precipitate isolated by filtration. Yield: 66%.

*ESI-MS* (MeOH): m/z 414.1(M+1, 100); 436.2 (M+Na, 30); 827.0 (2M+1, 7%)

*1H-NMR* (CDCl3):  (ppm): 8.5 (s, 2H); 8.2 (d, 2H); 8.0 (d, 2H); 7.9 (d, 2H); 7.8 (m, 3H); 7.5 (m, 8H); 5.3 (s, 4H).

*Elemental analysis*: calculated for C29H23N3: C 84.23%, N 10.16%, H 5.61%; found: C 84.30%, N 10.05%, H 5.65%.

**Synthesis of ligand II**

Same experimental procedure as described for **I**, using 2,6-diacetylpyridine (0.2 g; 1.2 mmol) and 1-naphthalenemethylamine (0.34 ml, 2.5 mmol). Yield: 65%.

*ESI-MS*: m/z 442.3(M+1)(50%); 464.4 (M+Na)(100);

*1H-NMR* (CD3CN): ppm 8.22 (dt, 2H); 8.15 (d, 2H); 7.97 (d, 2H); 7.87 (d, 2H); 7.78 (t, 1H); 7.71 (dd, 2H); 7.55 (m, 6H); 5.22 (s, 4H); 2.78 (s, 6H).

*Elemental analysis*: calculated for C31H27N3: C 84.32%, N 9.52%, H 6.16%; found: C 83.88%, N 9.85%, H 6.27%.

# Absorption and emission mesurements

UV-vis spectra were recorded on a Hewlett-Packard 8453 diode array or on a Varian Cary 100 spectrophotometer; emission spectra were taken on a Perkin-Elmer LS-50B luminescence spectrometer. Spectrophotometric and spectrofluorimetric titrations were performed on 10 ml samples of solutions of the ligand (10-5 M) in CH3CN, by microadditions of CH3CN stock solutions of metal triflate. In each experiment the overall addition was limited to about 200l, so that volume increment variation was not significant.

# NMR measurements

1H and 13C NMR spectra were recorded at 25 °C on a Bruker AVANCE 400 spectrometer, operating at 9.37 T. 1H and 13C NMR resonances in CD3CN of the free ligands **I** and **II** (9.5 x 10-4 M) and of their ZnII complexes were assigned through the following experiments: 1H, 13C with 1H-BB decoupling, DEPT(135), 1H-1H COSY, 1H-13C HMQC and 1H-13C HMBC. 1H NMR titration of **I** (9.2 x 10-4 M) in CD3CN was performed with several few L additions of a concentrated Zn(CF3SO3)2 solution in CD3CN, to a final ZnII/**I** ratio of 2/1.

# Figure S1

Absorption spectra registered during the titration of **I** (10-5 M in MeCN) with Zn(CF3SO3)2. Titration profile is reported in the inset (*n* = equiv ZnII/equiv **I**).

# Figure S2

Excitation spectra of **II** (10-5 M in acetonitrile ) in the presence of Zn(CF3SO3)2 (5 x 10-6 M):
(a) em = 340nm; (b) em = 500nm.
